# Supplementary material for: Polydopamine surface functionalization of 3D printed resin material for enhanced polystyrene adhesion towards insulation layers for 3D microelectrode arrays (3D MEAs)
Source: Royal Society of Chemistry journal article supplement (doi:10.1039/d2ra03911g), 2022-01-01
Supplement: d2ra03911g1.pdf [file d2ra03911g1.pdf]

## Supporting Information

### Polydopamine Surface Functionalization of 3D Printed Resin Material for Enhanced Polystyrene Adhesion Towards Insulation Layers for 3D Microelectrode Arrays (3D MEAs)

Nilab Azim,<sup>a,b</sup> Julia Freitas Orrico,<sup>a</sup> Divambal Appavoo,<sup>a</sup> Lei Zhai<sup>a,b</sup> and Swaminathan Rajaraman<sup>a,c,d,e</sup>

<sup>a</sup> NanoScience Technology Center (NSTC), <sup>b</sup> Department of Chemistry, <sup>c</sup> Department of Materials Science & Engineering, <sup>d</sup> Department of Electrical & Computer Engineering, <sup>e</sup> Burnett School of Biomedical Sciences, University of Central Florida, Orlando, FL, 32826, USA.

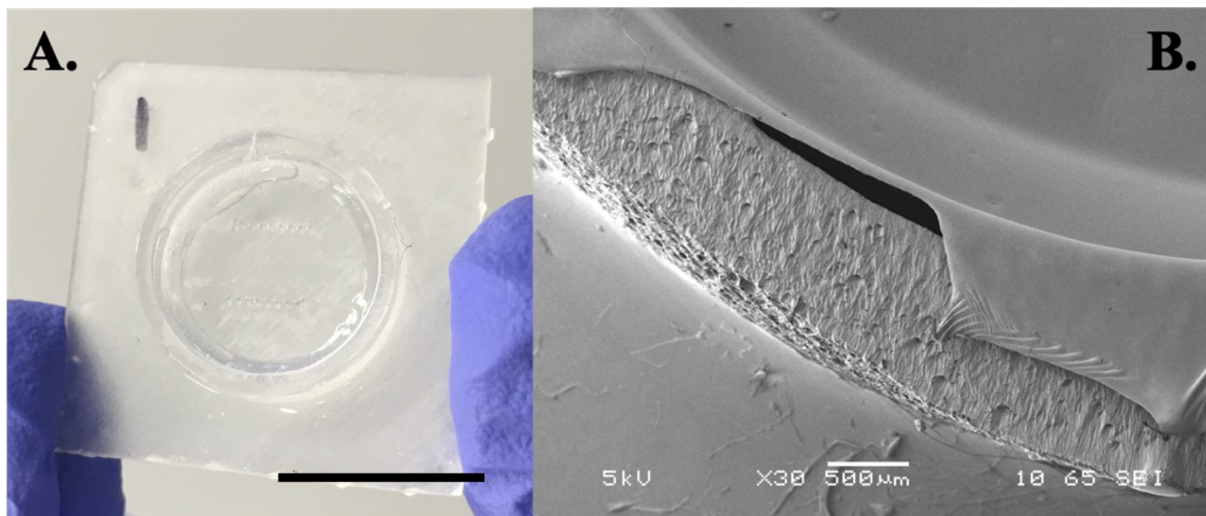

**Figure S1.** Camera (A) and SEM (B) images of “bubbling,” or delamination, of PS from the as printed 3D MEA substrate after incubation for 24 hours.

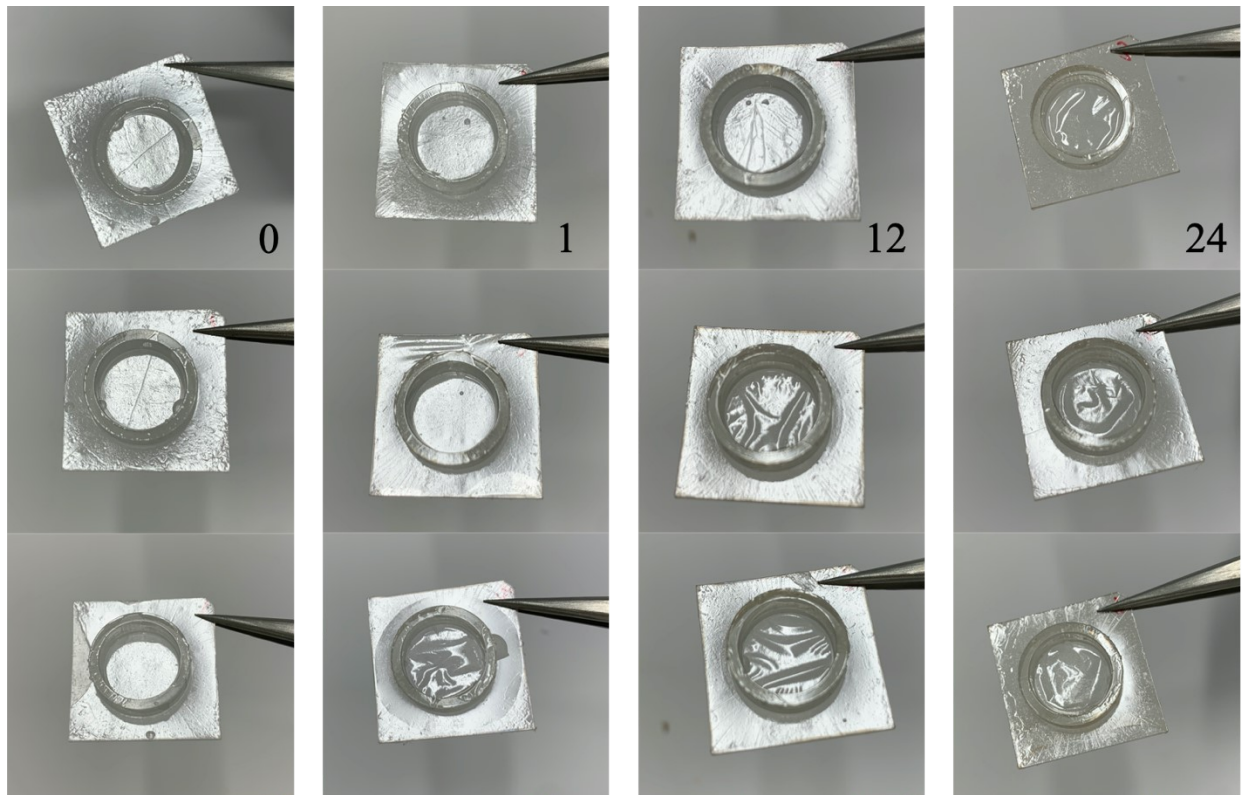

**Figure S2.** Images of control, 1-, 12-, and 24-hour PDA treated Asiga MAX printed culture wells coated with PS after incubation for 24 hours. Wrinkling as a result of no thermal annealing.

**Table S1.** Summary of adhesion tape peel testing on Asiga printed planar substrates, where the ratio is function of delaminated PS instances over the number of peel attempts (N=3).

|                      |                           | FLC  | 1-hr PDA | 12-hr PDA | 24-hr PDA |
|----------------------|---------------------------|------|----------|-----------|-----------|
| <b>Non-Incubated</b> | <b>As Is</b>              | 1.00 | 0.00     | 0.00      | 0.00      |
|                      | <b>Thermally Annealed</b> | 1.00 | 0.00     | 0.00      | 0.00      |
| <b>Incubated</b>     | <b>As Is</b>              | 1.00 | 0.33     | 0.67      | 0.33      |
|                      | <b>Thermally Annealed</b> | 1.00 | 1.00     | 0.33      | 0.33      |

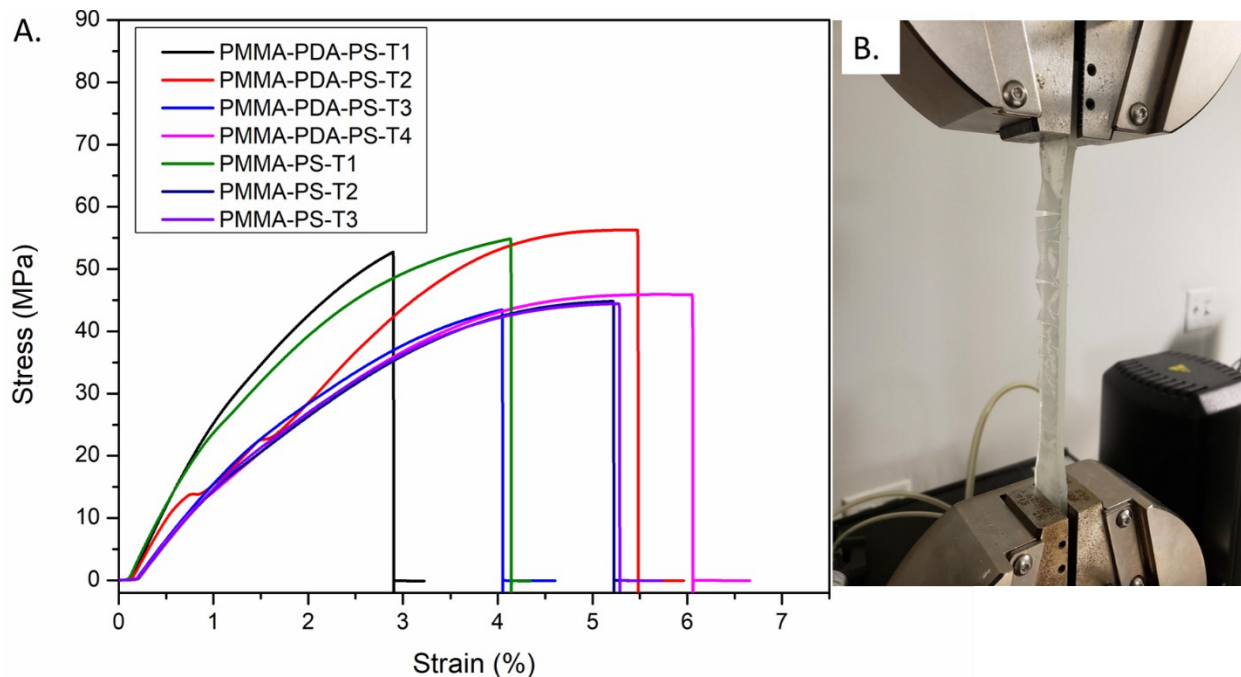

**Figure S3.** Stress versus strain plot for PMMA-PDA-PS and PMMA-PS dog bone samples (A.), delamination of PS observed in PMMA-PS sample (B.)

**Table S2. Mechanical properties of PMMA-PS with/without PDA**

| Sample              | Young's Modulus (MPa) | Elongation at break (%) | Tensile strength at breakage (MPa) |
|---------------------|-----------------------|-------------------------|------------------------------------|
| PMMA-PDA-PS-T1      | 29.135                | 2.88                    | 52.80                              |
| PMMA-PDA-PS-T2      | 15.405                | 5.48                    | 56.04                              |
| PMMA-PDA-PS-T3      | 19.062                | 4.04                    | 43.17                              |
| PMMA-PDA-PS-T4      | 17.486                | 6.04                    | 45.65                              |
| Average PMMA-PDA-PS | 20.272                | 4.61                    | 49.415                             |
| PMMA-PS-T1          | 25.035                | 4.12                    | 54.82                              |
| PMMA-PS-T2          | 18.159                | 5.21                    | 44.85                              |
| PMMA-PS-T3          | 17.867                | 5.28                    | 44.45                              |
| Average PMMA-PS     | 20.353                | 4.87                    | 48.04                              |

(Note: All data reported is an average of at least N=3 samples).

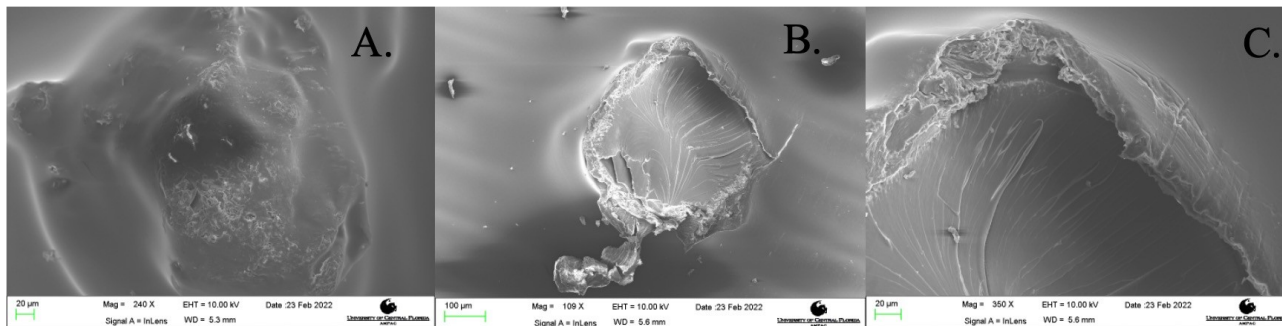

**Figure S4.** SEM images of (A) PDA-PS covered 3D printed microneedles, (B) mechanically broken 3D printed microneedle tip, and (C) close-up view of adhesion of PDA-PS coating.

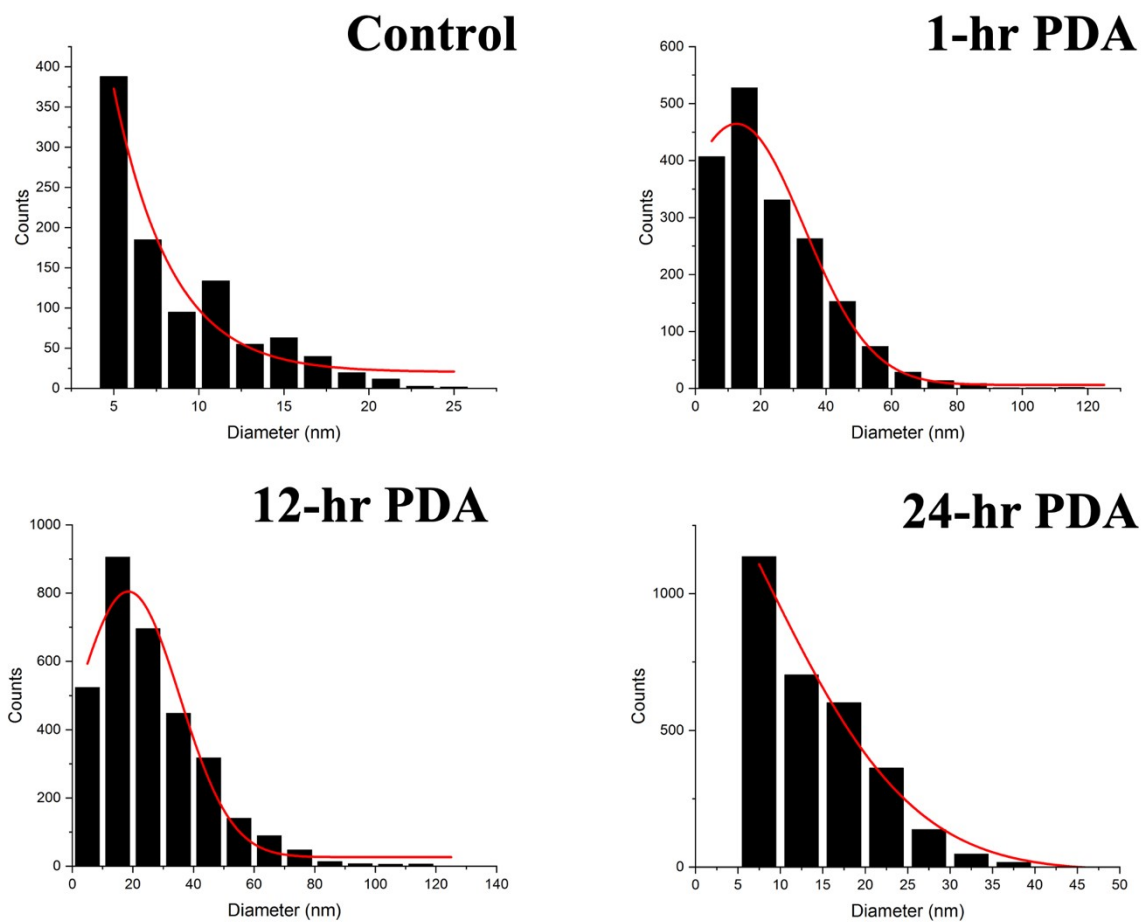

**Figure S5.** Gaussian distribution of nanoaggregates processed from the SEM images in Figure 5. All data reported is an average of at least N=3 samples.

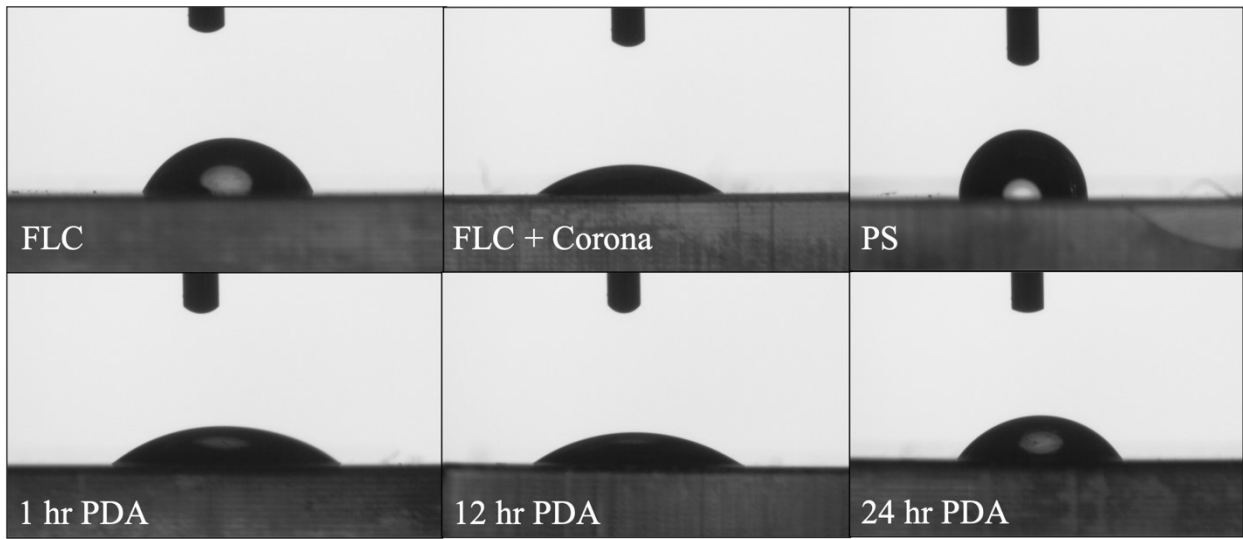

**Figure S6.** Water contact images of the various surfaces.
